# Supplementary material for: Knowledge in the Investigation of A-to-I RNA Editing Signals
Source: PubMed Central journal article supplement (PMC4338823; doi:10.3389/fbioe.2015.00018), 2015-02-24
Supplement: table_1.pdf [file table_1.pdf]

## Supplementary Material

### Knowledge in the Investigation of A-to-I RNA editing signals

Giovanni Nigita<sup>1,†</sup>, Salvatore Alaimo<sup>2,†</sup>, Alfredo Ferro<sup>3</sup>, Rosalba Giugno<sup>3,§,\*</sup>, Alfredo Pulvirenti<sup>3,§,\*</sup>

<sup>1</sup>Department of Molecular Virology, Immunology and Medical Genetics, Ohio State University, Columbus, Ohio, USA

<sup>2</sup>Department of Mathematics and Computer Science, University of Catania, Catania, Italy

<sup>3</sup>Department of Clinical and Experimental Medicine, University of Catania, Catania, Italy

\* **Correspondence:** Rosalba Giugno, Department of Clinical and Experimental Medicine, University of Catania, Via Santa Sofia, 78 | I-95122 Catania, Catania. Alfredo Pulvirenti, Department of Clinical and Experimental Medicine, University of Catania, Via Santa Sofia, 78 | I-95122 Catania, Catania.

giugno@dmi.unict.it; apulvirenti@dmi.unict.it

<sup>†</sup> Giovanni Nigita and Salvatore Alaimo have contributed equally to this work.

<sup>§</sup> Rosalba Giugno and Alfredo Pulvirenti have contributed equally to this work.

## 1. Supplementary Figures and Tables

### 1.1. Supplementary Tables

**Supplementary Table 1.** Comparison between AIRIINER and InosinePredict by means of experimentally validated A-to-I editing sites in literature. In the two score columns, boldface highlights sites predicted as editing, while italics identifies non-editing sites. The thresholds are 0.5 for AIRIINER and 9.6 for InosinePredict.

| Genomic Position (hg19) | Chr | Strand | Gene     | Type of region | Source                   | PubmedID | Reference                | DNA Sequence          | AIRIINER Score | InosinePredict Score |
|-------------------------|-----|--------|----------|----------------|--------------------------|----------|--------------------------|-----------------------|----------------|----------------------|
| <b>EDITING</b>          |     |        |          |                |                          |          |                          |                       |                |                      |
| 95160777                | 12  | -      | Unknown  | O              | Lymphoblastoid cell line | 22327324 | (Peng et al., 2012)      | TCGATTAAGAAACATAAAGAT | <i>0,1948</i>  | <b>17,2457</b>       |
| 102390869               | 12  | +      | Unknown  | O              | Lymphoblastoid cell line | 22327324 | (Peng et al., 2012)      | CAGTAGAGACAGGGTTTCTTC | <b>0,5433</b>  | <i>6,4933</i>        |
| 30717091                | 17  | +      | Unknown  | O              | Lymphoblastoid cell line | 22327324 | (Peng et al., 2012)      | TACAAAAATTAGCTGGGCATG | <i>0,4830</i>  | <b>100,0000</b>      |
| 114082694               | X   | +      | 5HT2C    | EC             | Cerebellum               | 19478186 | (Li et al., 2009)        | ACGTAATCCTATTGAGCATAG | <b>0,6739</b>  | <b>34,5483</b>       |
| 277003                  | 2   | +      | ACP1     | EC             | Spinal cord              | 22957051 | (Picardi et al., 2012)   | AAAAGTAATCAAGTTAAACC  | <i>0,0971</i>  | <i>9,0628</i>        |
| 44153619                | 7   | +      | AEBP1    | EC             | Cerebellum               | 22912834 | (Zhu et al., 2012)       | GCTGGCTGGGAGGATCGGAG  | <b>0,8000</b>  | <i>1,9220</i>        |
| 23442122                | 14  | -      | AJUBA    | E3             | Lymphoblastoid cell line | 23291724 | (Ramaswami et al., 2013) | CTAAACCAAGATCAGTCAAAT | <i>0,2619</i>  | <i>1,0935</i>        |
| 73980019                | 10  | +      | ANAPC16  | I              | Lymphoblastoid cell line | 22327324 | (Peng et al., 2012)      | TCCGGGAGGAGGAGGTTGCTG | <b>0,6394</b>  | <i>6,6744</i>        |
| 161035025               | 1   | -      | ARHGAP30 | I              | Lymphoblastoid cell line | 22327324 | (Peng et al., 2012)      | GAGCCGGAGGATTCACGACC  | <b>0,7506</b>  | <i>0,9674</i>        |
| 116937809               | 1   | +      | ATP1A1   | EC             | Brain                    | 22957051 | (Picardi et al., 2012)   | GAATTCCTATCGATAATCT   | <b>0,6185</b>  | <b>34,8247</b>       |

| Genomic Position (hg19) | Chr | Strand | Gene     | Type of region | Source                   | PubmedID | Reference                 | DNA Sequence           | AIRINER Score | InosinePredict Score |
|-------------------------|-----|--------|----------|----------------|--------------------------|----------|---------------------------|------------------------|---------------|----------------------|
| <b>EDITING</b>          |     |        |          |                |                          |          |                           |                        |               |                      |
| 103841636               | 8   | -      | AZIN1    | EC             | Cerebellum               | 22912834 | (Zhu et al., 2012)        | TCTTCTGTCGAAAGGTGTTAA  | <b>0,5178</b> | <i>0,7447</i>        |
| 36147533                | 20  | -      | BLCAP    | EC             | Cerebellum               | 22912834 | (Zhu et al., 2012)        | CAACTCCCCGAACCCCTACTC  | <b>0,7098</b> | <i>1,2228</i>        |
| 62458275                | 11  | -      | BSCL2    | EC             | Cerebellum               | 19478186 | (Li et al., 2009)         | GACTCCCTAGAAGTCCCGAGA  | <b>0,5221</b> | <i>1,0823</i>        |
| 77979680                | 4   | -      | CCNI     | EC             | Breast Cancer            | 22912834 | (Zhu et al., 2012)        | CGATTTTTGGATAGGTTTTCT  | <b>0,7096</b> | <i>0,6212</i>        |
| 9841186                 | 12  | +      | CLEC2D   | I              | Lymphoblastoid cell line | 22327324 | (Peng et al., 2012)       | ATGGTGGCATAACGCCTGTAGT | <b>0,5945</b> | <b>40,6423</b>       |
| 126132620               | 9   | +      | CRB2     | EC             | Cerebellum               | 22912834 | (Zhu et al., 2012)        | CCCACCTGGTACCCATGGACC  | <b>0,7307</b> | <b>52,7592</b>       |
| 156736808               | 5   | +      | CYFIP2   | EC             | Cerebellum               | 19478186 | (Li et al., 2009)         | CAGATACATTAAGACCAGTGC  | <b>0,5193</b> | <b>100,0000</b>      |
| 32456380                | 9   | -      | DDX58    | E3             | Brain                    | 23291724 | (Ramaswami et al., 2013)  | CATCATTGATTTTTACCGA    | <b>0,7275</b> | <b>32,6700</b>       |
| 179044110               | 1   | +      | FAM20B   | E3             | Lymphoblastoid cell line | 22327324 | (Peng et al., 2012)       | AGATCACCTGAGGCCAGGAGT  | <b>0,6211</b> | <i>3,6274</i>        |
| 55765797                | 14  | +      | FBXO34   | I              | Lymphoblastoid cell line | 22327324 | (Peng et al., 2012)       | GTTTGAGAAAAGTCTGACGA   | <i>0,3973</i> | <b>20,0042</b>       |
| 130629624               | 7   | -      | FLJ43663 | E3             | Brain                    | 23291724 | (Ramaswami et al., 2013)  | GAGTAGAAGGAAATTAAGAAT  | <i>0,1817</i> | <i>0,9987</i>        |
| 153579950               | X   | -      | FLNA     | EC             | Brain                    | 19478186 | (Li et al., 2009)         | CACGGAGTGGACTCCGATCT   | <b>0,6034</b> | <i>0,8778</i>        |
| 58141801                | 3   | +      | FLNB     | EC             | Cerebellum               | 22912834 | (Zhu et al., 2012)        | ATGAGCCTTCAGGTGAGATGC  | <b>0,5081</b> | <b>14,4591</b>       |
| 151358319               | X   | -      | GABRA3   | EC             | Cerebellum               | 19478186 | (Li et al., 2009)         | TTGTCTGCCGATACTGGTCA   | <b>0,7825</b> | <i>0,6529</i>        |
| 57864624                | 12  | +      | CLI1     | EC             | Cerebellum               | 22912834 | (Zhu et al., 2012)        | CATGGATGCTAGAGGGCTACA  | <b>0,7451</b> | <b>68,7209</b>       |
| 158257875               | 4   | +      | GRIA2    | EC             | Cerebellum               | 19478186 | (Li et al., 2009)         | GCCTTTATGCAGCAAGGATGC  | <b>0,5342</b> | <i>4,5598</i>        |
| 122598962               | X   | +      | GRIA3    | EC             | Cerebellum               | 19478186 | (Li et al., 2009)         | CTCAGCATTAAAGTGGGTGGA  | <b>0,6628</b> | <b>37,6124</b>       |
| 105804694               | 11  | +      | GIRA4    | EC             | Brain                    | 21984433 | (Silberberg et al., 2012) | TTCTCATTAAAGTGGGTGGA   | <b>0,6766</b> | <b>37,6124</b>       |
| 30953750                | 21  | -      | GRIK1    | EC             | Cerebellum               | 19478186 | (Li et al., 2009)         | ACATGGAACGACGTACTCTCG  | <b>0,5199</b> | <i>1,2055</i>        |
| 102337702               | 6   | +      | GRIK2    | EC             | Cerebellum               | 19478186 | (Li et al., 2009)         | CTGCTGGCTTACTGGGTGTC   | <b>0,8491</b> | <b>83,5633</b>       |
| 57976286                | 4   | -      | IGFBP7   | EC             | Cerebellum               | 19478186 | (Li et al., 2009)         | GTCATGGGGGACGGCCCGGC   | <b>0,8084</b> | <i>1,1401</i>        |
| 44181739                | 12  | +      | IRAK4    | E3             | Lymphoblastoid cell line | 22327324 | (Peng et al., 2012)       | GGACACCTGTAGTCCCAGCTA  | <b>0,7060</b> | <b>57,0387</b>       |
| 5021742                 | 12  | +      | KCNA1    | EC             | Cerebellum               | 19478186 | (Li et al., 2009)         | TGTGCTAACAATTGCCCTGCC  | <b>0,7873</b> | <b>14,0327</b>       |
| 79397298                | 10  | -      | KCNMA1   | EC             | Cerebellum               | 22912834 | (Zhu et al., 2012)        | CGCAGATCCGACTCTACCAAG  | <b>0,5974</b> | <i>1,1990</i>        |
| 73843194                | 6   | +      | KCNQ5    | EC             | Cerebellum               | 22912834 | (Zhu et al., 2012)        | CCCAGGGGCGAGATTAAAG    | <b>0,5789</b> | <i>7,1646</i>        |
| 241700776               | 2   | -      | KIF1A    | EC             | Cerebellum               | 22912834 | (Zhu et al., 2012)        | GTCGAGTGTGAGGGCGAGACA  | <b>0,7037</b> | <i>3,4524</i>        |
| 28662186                | 1   | +      | MED18    | E3             | Lymphoblastoid cell line | 22327324 | (Peng et al., 2012)       | TACAAAATTTAGCCGGGCATG  | <b>0,5502</b> | <b>62,5820</b>       |
| 417757                  | 16  | -      | MRPL28   | EC             | Spinal cord              | 22957051 | (Picardi et al., 2012)    | GAGGCGGTGTATCTAGAACTT  | <b>0,7056</b> | <b>22,3593</b>       |
| 15986074                | 1   | -      | NCSTN    | EC             | Cerebellum               | 22912834 | (Zhu et al., 2012)        | TAATACACTTACGTATAATTA  | <i>0,1563</i> | <b>69,4973</b>       |
| 75646086                | 15  | +      | NEIL1    | EC             | Cerebellum               | 19478186 | (Li et al., 2009)         | ACAGGGGGCAAAGGCTACGGG  | <b>0,6865</b> | <b>21,1966</b>       |
| 25987370                | 14  | +      | NOVA1    | EC             | Brain                    | 22957051 | (Picardi et al., 2012)    | AGCTAATTGGATTGGATGACC  | <b>0,6428</b> | <i>0,6752</i>        |

| Genomic Position (hg19) | Chr | Strand | Gene    | Type of region | Source                                      | PubmedID | Reference                | DNA Sequence          | AIRINER Score | InosinePredict Score |
|-------------------------|-----|--------|---------|----------------|---------------------------------------------|----------|--------------------------|-----------------------|---------------|----------------------|
| <b>EDITING</b>          |     |        |         |                |                                             |          |                          |                       |               |                      |
| 8173299                 | 17  | +      | PFAS    | E3             | Lymphoblastoid cell line                    | 22327324 | (Peng et al., 2012)      | GGGTTCAAGCAATTTCTGC   | <b>0,5757</b> | 5,2469               |
| 45567409                | 12  | -      | PLEKHA9 | EC             | Lymphoblastoid cell line                    | 22327324 | (Peng et al., 2012)      | GAATTATAAAAGTTGTTCTAG | 0,3064        | <b>51,4919</b>       |
| 157333469               | 7   | -      | PTPRN2  | EC             | Cerebellum                                  | 22912834 | (Zhu et al., 2012)       | GTCGCGCTTGAGTTTGACGAG | <b>0,7717</b> | 2,8627               |
| 34923319                | 21  | +      | SON-1   | EC             | Lymphoblastoid cell line                    | 22327324 | (Peng et al., 2012)      | CTGGGGCACTAGAGTTGCCTG | <b>0,8611</b> | <b>77,1102</b>       |
| 29681719                | 16  | +      | SPN     | E3             | Lymphoblastoid cell line                    | 22327324 | (Peng et al., 2012)      | CTGAGGCAGAAGAATTGCTTG | <b>0,5713</b> | <b>41,4219</b>       |
| 225974614               | 1   | +      | SRP9    | EC             | U87MG                                       | 21725310 | (Ju et al., 2011)        | GCATGATCATAGCTCACTGCA | <b>0,7247</b> | <b>67,5020</b>       |
| 44120349                | 6   | +      | TMEM63B | EC             | Astrocytoma cell lines overexpressing ADAR2 | 22957051 | (Picardi et al., 2012)   | TACGAGTTCAGTTTGGCGCA  | <b>0,7220</b> | 6,5476               |
| 54955567                | X   | +      | TRO     | EC             | Cerebellum                                  | 22912834 | (Zhu et al., 2012)       | CACCAGCACTAGTTTCAGCAG | <b>0,7445</b> | <b>90,1242</b>       |
| 9876560                 | 3   | +      | TLL3    | EC             | Cerebellum                                  | 22912834 | (Zhu et al., 2012)       | CTTGATTTCAAGTTGGCACCC | <b>0,7084</b> | <b>28,0769</b>       |
| 52604985                | 13  | +      | UTP14C  | EC             | Lymphoblastoid cell line                    | 22327324 | (Peng et al., 2012)      | CATCAGGTACAAGTCTTCCA  | 0,4326        | 4,2981               |
| 37037181                | 19  | -      | ZNF529  | E3             | Lymphoblastoid cell line                    | 23291724 | (Ramaswami et al., 2013) | TATATTGGTCAAGGATACATA | 0,1506        | <b>11,0583</b>       |
| <b>NON EDITING</b>      |     |        |         |                |                                             |          |                          |                       |               |                      |
| 89160357                | 2   | -      | Unknown | O              | Lymphoblastoid cell line                    | 22327324 | (Peng et al., 2012)      | GCGAGGTTTAAATTTGGAAT  | 0,4962        | <b>34,0340</b>       |
| 95160789                | 12  | -      | Unknown | O              | Lymphoblastoid cell line                    | 22327324 | (Peng et al., 2012)      | CATAAAGATCATCTCTACCCC | 0,4478        | 7,6514               |
| 32456371                | 9   | -      | DDX58   | I              | Lymphoblastoid cell line                    | 23291724 | (Ramaswami et al., 2013) | GTCGAAAATCATCATTCTGAT | 0,3480        | 5,3436               |
| 28662180                | 1   | +      | MED18   | E3             | Lymphoblastoid cell line                    | 22327324 | (Peng et al., 2012)      | GAAAAATACAAAATTTAGCCG | 0,2198        | <b>26,8839</b>       |
| 234775041               | 2   | -      | MSL3L2  | EC             | Lymphoblastoid cell line                    | 22327324 | (Peng et al., 2012)      | TTAACAGTCCATGCTCGAAGG | 0,4911        | 2,4136               |
| 54946784                | 19  | +      | TTYH1   | EC             | Brain                                       | 22957051 | (Picardi et al., 2012)   | TCTTCTGCTACTCTTCTCCC  | <b>0,8735</b> | <b>47,8726</b>       |
| 8578035                 | 19  | -      | ZNF414  | EC             | Unknown                                     | 22957051 | (Picardi et al., 2012)   | CCTCGGACGACGTAGGGAGG  | <b>0,7098</b> | 1,4771               |

## References

- Ju, Y. S., Kim, J.-I., Kim, S., Hong, D., Park, H., Shin, J.-Y., et al. (2011). Extensive genomic and transcriptional diversity identified through massively parallel DNA and RNA sequencing of eighteen Korean individuals. *Nature Genetics*, 43(8), 745–752. doi:10.1038/ng.872
- Li, J. B., Levanon, E. Y., Yoon, J.-K., Aach, J., Xie, B., Leproust, E., et al. (2009). Genome-wide identification of human RNA editing sites by parallel DNA capturing and sequencing. *Science*, 324 (5931), 1210–1213. doi:10.1126/science.1170995
- Peng, Z., Cheng, Y., Tan, B. C.-M., Kang, L., Tian, Z., Zhu, Y., et al. (2012). Comprehensive analysis of RNA-Seq data reveals extensive RNA editing in a human transcriptome. *Nature Biotechnology*, 30 (3), 253–260. doi:10.1038/nbt.2122
- Picardi, E., Gallo, A., Galeano, F., Tomaselli, S., & Pesole, G. (2012). A novel computational strategy to identify A-to-I RNA editing sites by RNA-Seq data: de novo detection in human spinal cord tissue. *PLoS ONE*, 7(9), e44184. doi:10.1371/journal.pone.0044184.s005
- Ramaswami, G., Zhang, R., Piskol, R., Keegan, L. P., Deng, P., O'Connell, M. A. A., & Li, J. B. (2013). Identifying RNA editing sites using RNA sequencing data alone. *Nature Methods*, 10 (2), 128–132. doi:10.1038/nmeth.2330
- Silberberg, G., Lundin, D., Navon, R., & O'hman, M. (2012). Deregulation of the A-to-I RNA editing mechanism in psychiatric disorders. *Human Molecular Genetics*, 21(2), 311–321. doi:10.1093/hmg/ddr461
- Zhu, H., Urban, D. J., Blashka, J., McPheeters, M. T., Kroeze, W. K., Mieczkowski, P., et al. (2012). Quantitative Analysis of Focused A-To-I RNA Editing Sites by Ultra-High-Throughput Sequencing in Psychiatric Disorders. *PLoS ONE*, 7(8), e43227. doi:10.1371/journal.pone.0043227.s015
